# Supplementary material for: Nitrogen fertilization affects maize grain yield through regulating nitrogen uptake, radiation and water use efficiency, photosynthesis and root distribution
Source: PeerJ. 2020 Nov 16;8:e10291. doi: 10.7717/peerj.10291 (PMC7676353; doi:10.7717/peerj.10291)
Supplement: Supplemental Information 1 [file peerj-08-10291-s001.xlsx]

## Sheet: raw data
date	Precipitation	Mean Temperature	date	Precipitation	Mean Temperature	date	Precipitation	Mean Temperature	date	Precipitation	Mean Temperature			repetition	year	nitrogen rate	grain yield（t/hm2)	biomass yield（t/ha)	ET（mm)	IPAR	SNC（kg/ha)	GNC（kg/ha)	RUE	WUE	NHI	AEN	REN						Root dry matter(g/plant)				Root volume(cm3/plant)				Root surface (cm2/plant)				Root length density(mm/cm3)
2014-06-12	0.4	23.3	2015-06-12	0	23.8	2016-06-17		26.8	2017-06-15		23.4			1	2014	300	9.94764	18.2041	349.3	1065.41	204.4	115.017	1.73573	28.4788	56.2706	7.368	31.808		repetition	year	soil layer	nitrogen rate	V8	VT	R3	R6	V8	VT	R3	R6	V8	VT	R3	R6	V8	VT	R3	R6
2014-06-13	0.9	21.1	2015-06-13	0	24.6	2016-06-18		27.9	2017-06-16		25.1			1	2014	225	10.0522	16.5216	346.5	1035.56	181.786	117.247	1.80454	29.0108	64.4973	10.2888	32.36		1	2016	0-30	N0	1.1378	14.4183	13.9879	11.0128	11.3056	49.2059	28.7249	28.6351	140.5	435.776	308.098	253.031	0.4167	0.9557	0.7688	0.562
2014-06-14	0.1	21.1	2015-06-14	0	23.5	2016-06-19		29.7	2017-06-17		24.5			1	2014	150	9.48236	16.9285	343.9	1027.82	158.944	99.408	1.71505	27.573	62.5427	11.6342	33.3126		1	2016	0-30	N150	1.6311	21.4399	18.547	15.2506	18.2778	92.0038	67.7823	55.6371	178.167	697.617	606.641	506.435	0.5278	1.3013	1.6387	1.1822
2014-06-15	0	23.7	2015-06-15	4.5	19.7	2016-06-20		28.4	2017-06-18		26.2			1	2014	0	7.73724	13.7521	336.5	987.905	108.975	71.1981	1.45596	22.9933	65.334				1	2016	0-30	N225	2.7622	22.3869	21.7296	18.4173	39.9222	97.0196	95.4766	80.9102	360.639	649.801	792.677	688.884	1.0278	1.6339	2.4936	1.8936
2014-06-16	0	27.6	2015-06-16	1.2	20.2	2016-06-21	3.1	25.4	2017-06-19		25.6			2	2014	300	10.3887	18.3211	350	978.236	212.664	128.058	1.97423	29.682	60.2161	7.54819	36.1693		1	2016	0-30	N300	2.7778	21.4567	19.9013	16.3101	33.2556	85.6628	85.4744	72.6372	325.25	570.476	739.33	620.354	0.9167	1.3194	0.8883	1.607
2014-06-17	12.9	25.4	2015-06-17	0	23.6	2016-06-22		28.1	2017-06-20		24.5			2	2014	225	10.7948	18.374	349.1	979.603	210.235	139.253	2.04854	30.9218	66.2367	11.869	47.1461		1	2016	30-60	N0	0	1.5804	1.2985	1.0531	0.0556	7.5191	3.104	2.0413	0.1667	119.02	15.4882	38.6736	0	0.4891	0.2301	0.1406
2014-06-18	0	26.8	2015-06-18	0	26.4	2016-06-23	34.7	22	2017-06-21	0	25.4			2	2014	150	9.79631	16.48	339.8	929.261	168.183	111.395	1.95977	28.8296	66.2345	11.1471	42.6843		1	2016	30-60	N150	0	1.3718	1.3416	1.3398	0.1389	4.454	3.5057	2.7078	1.0278	94.1719	96.4739	70.2598	0	0.328	0.4735	0.3699
2014-06-19	0.8	24.3	2015-06-19	0	26.9	2016-06-24		23.4	2017-06-22		27.6			2	2014	0	8.12425	13.6802	332	857.807	104.156	68.4712	1.76065	24.4706	65.7389				1	2016	30-60	N225	0.0278	1.6501	1.5337	1.4511	0.8333	9.0315	7.1129	5.5151	9.4444	117.456	145.64	100.242	0.0278	0.3851	0.5746	0.3989
2014-06-20	0	23.1	2015-06-20	0	25.2	2016-06-25	0.6	24.8	2017-06-23		26.6			3	2014	300	10.2404	17.8846	351.5	877.051	223.757	138.402	2.17057	29.1335	61.8537	7.82002	37.3303		1	2016	30-60	N300	0.0278	1.5185	1.2911	1.2312	2.0556	6.72	6.6065	2.9204	11.1667	101.514	78.4393	53.0609	0.0556	0.341	0.5126	0.1812
2014-06-21	0	25.2	2015-06-21	0	23.4	2016-06-26		24.8	2017-06-24		27.3			3	2014	225	10.703	18.8028	343	866.183	203.371	127.842	2.29708	31.2041	62.8612	12.4826	40.7132		1	2016	60-90	N0	0	0.4203	0.1269	0.12	0	4.5514	2.1457	1.0398	0	117.874	50.8926	31.3359	0	0.3518	0.1278	0.0881
2014-06-22	0	25.7	2015-06-22	0	24.8	2016-06-27		24.4	2017-06-25		26.5			3	2014	150	9.24418	15.884	345.1	1011.33	162.152	107.767	1.69925	26.787	66.4603	8.99831	33.5903		1	2016	60-90	N150	0	0.0745	0.2766	0.276	0	1.5721	3.3247	2.7043	0	27.6975	96.2177	76.4317	0	0.0698	0.2691	0.2226
2014-06-23	0	28.1	2015-06-23	10.9	21	2016-06-28		27.8	2017-06-26		26.7			3	2014	0	7.89443	13.9843	331.6	872.158	111.766	70.6078	1.68269	23.8071	63.1744				1	2016	60-90	N225	0	0.0552	0.3383	0.3604	0	3.4115	5.5165	4.0659	0	39.5865	125.048	93.2037	0	0.1752	0.4078	0.2675
2014-06-24	2	24	2015-06-24	11.3	19.5	2016-06-29		28.4	2017-06-27		27.8			1	2015	300	10.1873	17.9559	333.7	1272.53	198.436	125.283	1.48822	30.5283	63.1354	8.41353	29.2948		1	2016	60-90	N300	0	0.0319	0.1379	0.085	0	1.1754	2.3132	0.9048	0	11.774	46.7847	28.8117	0	0.0117	0.199	0.0699
2014-06-25	0.9	21	2015-06-25	4.1	22.7	2016-06-30		28.3	2017-06-28		28.6			1	2015	225	11.476	18.3443	333.6	1262.03	187.602	133.041	1.69045	34.4005	70.9168	16.9457	34.2447		1	2017	0-30	N0	1.4444	15.0734	15.118	11.7382	12.5	51.3244	40.7106	34.44	176.694	600.22	364.634	313.53	0.5556	1.0594	1.0249	0.6301
2014-06-26	0	25.2	2015-06-26	12.6	22.1	2016-07-01		28	2017-06-29	0.7	26.3			1	2015	150	10.6489	17.2383	318	1223.53	162.387	112.733	1.61797	33.487	69.4225	19.9043	34.5568		1	2017	0-30	N150	2.1389	23.2551	20.6621	16.8249	22.4167	106.124	78.3595	67.2851	263.611	732.472	643.95	514.19	0.5833	1.5155	2.0394	1.6355
2014-06-27	0	28.2	2015-06-27	13.5	20.4	2016-07-02		28	2017-06-30		25.4			1	2015	0	7.66322	13.6136	300.4	1159.67	110.551	68.2762	1.22845	25.51	61.7597				1	2017	0-30	N225	4.4167	24.3628	20.5925	20.0092	40.1111	119.795	95.1314	99.8975	488.361	722.79	733.913	729.013	1.0536	1.8429	2.8532	2.8205
2014-06-28	15.2	23.9	2015-06-28	9.2	20.4	2016-07-03		27.4	2017-07-01		26.7			2	2015	300	11.1288	18.9492	339.9	1186.64	200.584	127.387	1.74344	32.7413	63.508	8.64785	28.7386		1	2017	0-30	N300	2.8889	23.416	18.7022	18.4539	34.7222	97.8717	79.8256	75.9249	404.028	663.095	685.576	656.183	1.0211	1.4535	1.6719	1.3665
2014-06-29	0.9	24.6	2015-06-29	19.6	22.3	2016-07-04		28	2017-07-02		28.2			2	2015	225	10.5934	18.0514	340	1184.46	188.924	122.898	1.66262	31.1571	65.0517	9.15103	33.136		1	2017	30-60	N0	0.0056	1.5972	1.2839	1.0688	0.25	8.9777	3.5703	2.7039	0.3306	154.63	27.24	58.0435	0.0278	0.6134	0.3069	0.2675
2014-06-30	0	24.7	2015-06-30	0.7	25.2	2016-07-05		27.9	2017-07-03		28.3			2	2015	150	9.90343	16.8894	317.5	1136.09	156.112	99.3928	1.62051	31.1919	63.6674	9.12666	27.8296		1	2017	30-60	N150	0.0194	1.3753	1.3725	1.5117	0.3333	5.8238	4.1715	3.7317	1.7972	117.367	103.416	101.593	0.0003	0.4681	0.5015	0.5039
2014-07-01	0	26.3	2015-07-01	0	27.8	2016-07-06		28.4	2017-07-04		29			2	2015	0	8.53443	14.5776	306.9	1074.34	114.368	73.3772	1.47677	27.8085	64.1588				1	2017	30-60	N225	0.1189	1.7569	1.7026	1.6273	1.25	11.6266	9.0011	7.0329	14.9722	144.23	178.437	154.159	0.0556	0.5617	0.6348	0.551
2014-07-02	0	26.9	2015-07-02	0	26.7	2016-07-07		28.9	2017-07-05	1.8	24.4			3	2015	300	10.7766	18.9546	334.3	1084.15	207.366	129.357	1.84788	32.2365	62.3812	7.27317	32.5342		1	2017	30-60	N300	0.1311	1.6082	1.4053	1.3165	2.8889	8.8186	7.5927	3.52	12.0833	122.983	105.735	68.2048	0.0556	0.5157	0.6051	0.3477
2014-07-03	1.6	24.9	2015-07-03	0	24.2	2016-07-08		30.3	2017-07-06	18.5	23.4			3	2015	225	11.1364	19.2597	336.5	1091.89	197.785	129.246	1.89603	33.0948	65.3465	11.2965	39.121		1	2017	60-90	N0	0	0.6467	0.2218	0.1127	0	5.7939	3.1668	2.1075	0	156.093	63.6779	39.4595	0	0.479	0.2268	0.1082
2014-07-04	0	26.6	2015-07-04	0	24.3	2016-07-09		30	2017-07-07		26.9			3	2015	150	10.0182	17.9	316.9	1034.66	165.343	108.747	1.79999	31.6131	65.7703	9.48988	37.0532		1	2017	60-90	N150	0	0.0751	0.3593	0.3489	0	2.4917	3.8571	3.2951	0	49.1113	107.061	95.3966	0	0.1394	0.3794	0.2959
2014-07-05	0	27.5	2015-07-05	0.1	24.4	2016-07-10		27.5	2017-07-08		24.6			3	2015	0	8.5947	15.0068	303	1180.82	109.763	72.3622	1.35308	28.3653	65.9258				1	2017	60-90	N225	0	0.057	0.4254	0.4332	0	5.1287	6.8983	4.6743	0	93.1861	154.118	143.403	0	0.3192	0.4563	0.3288
2014-07-06	0	28.7	2015-07-06	0	24.3	2016-07-11	4.8	27.4	2017-07-09		29.2			1	2016	300	11.3385	20.213	420.45	1154.38	234.386	134.273	1.82594	26.9676	57.2872	10.13	43.3617		1	2017	60-90	N300	0	0.0318	0.2231	0.2006	0	1.5155	3.4185	1.1111	0	33.9761	80.7297	53.8893	0	0.0941	0.3307	0.1048
2014-07-07	0	30.3	2015-07-07	0	25.7	2016-07-12	5.9	27.1	2017-07-10		29.8			1	2016	225	10.726	18.5164	396.06	1141.47	204.487	134.29	1.74683	27.0817	65.6717	10.7844	44.5274		2	2016	0-30	N0	0.8067	15.5454	13.1943	10.3729	10.0833	50.1224	36.416	26.9628	124.528	374.329	281.96	228.398	0.3953	0.8475	0.6959	0.5312
2014-07-08	0	29.7	2015-07-08	0	26.5	2016-07-13	0.6	23.8	2017-07-11		30.3			1	2016	150	9.47794	18.3888	389.37	1142.18	176.472	97.8864	1.54262	24.3417	55.4686	7.85622	48.1143		2	2016	0-30	N150	1.4244	19.0781	17.5114	14.4204	16.2778	81.6326	63.9266	52.3752	156.972	607.207	563.455	469.671	0.4572	1.1624	1.5427	1.1125
2014-07-09	10.6	22	2015-07-09	0	25	2016-07-14	15	21.3	2017-07-12		31.8			1	2016	0	8.2995	14.8164	376.01	1120.36	104.301	59.5274	1.37713	22.0726	57.0729				2	2016	0-30	N225	3.3033	19.1646	20.4181	17.3255	35.5633	85.2583	89.8982	76.5781	318.583	573.204	745.101	639.794	0.9517	1.4451	2.303	1.7819
2014-07-10	3.4	21.6	2015-07-10	0	26.2	2016-07-15		23	2017-07-13		31.7			2	2016	300	10.579	18.7415	396.91	1141.1	224.769	131.101	1.72346	26.6534	58.3271	5.05171	33.2158		2	2016	0-30	N300	2.5944	19.8851	19.7647	15.4513	31.1944	80.7221	80.7746	68.5976	306.306	536.398	696.059	569.852	0.8611	1.2431	0.8215	1.5186
2014-07-11	0	24.9	2015-07-11	0	26.9	2016-07-16		27.6	2017-07-14		31.3			2	2016	225	11.8852	20.3949	440.34	1139.04	214.801	137.997	1.93974	26.9909	64.2442	12.5408	39.8574		2	2016	30-60	N0	0	1.4892	1.2202	0.9908	0.0556	7.0792	2.9209	1.9214	0.1667	112.36	14.6417	36.5268	0	0.4616	0.2178	0.1329
2014-07-12	0	28.4	2015-07-12	0	27.9	2016-07-17		26.8	2017-07-15		28.2			2	2016	150	10.3534	18.1584	395.65	1123.02	174.996	109.723	1.71385	26.168	62.7001	8.59925	33.2497		2	2016	30-60	N150	0	1.2993	1.2603	1.2602	0.1389	4.1959	3.3155	2.5483	0.9722	88.4794	90.7598	66.5905	0	0.3082	0.4348	0.3508
2014-07-13	0	27.3	2015-07-13	0	29	2016-07-18	31.7	24.6	2017-07-16		27.8			2	2016	0	9.06349	15.9311	422.57	1108.49	125.122	81.9142	1.52	21.4485	65.4676				2	2016	30-60	N225	0.0278	1.7516	1.4494	1.5311	0.7778	9.5302	6.7259	5.8518	8.9444	124.132	137.918	109.876	0.0278	0.4064	0.544	0.4344
2014-07-14	7.3	26.5	2015-07-14	0	28.3	2016-07-19	9.7	24.9	2017-07-17		27.8			3	2016	300	11.8811	20.9212	425.28	1127.83	243.406	160.338	1.95836	27.9371	65.8727	11.9776	41.6676		2	2016	30-60	N300	0.0278	1.6099	1.219	1.3039	1.9444	7.0841	6.2168	3.0847	10.5278	107.829	73.8062	60.4299	0.0556	0.3626	0.4834	0.1919
2014-07-15	0	27.7	2015-07-15	3.5	24.5	2016-07-20		26.4	2017-07-18		30.1			3	2016	225	11.6885	20.4593	412.44	1091.46	215.444	131.18	1.9908	28.3399	60.8883	15.1143	43.129		2	2016	60-90	N0	0	0.6444	0.12	0.1277	0	4.8112	2.0197	1.0974	0	125.542	47.833	33.0577	0	0.3719	0.121	0.0935
2014-07-16	0	29.2	2015-07-16	0	23.3	2016-07-21		27.6	2017-07-19		31			3	2016	150	9.38378	18.7665	413	1094.18	182.308	101.602	1.59429	22.721	55.731	7.30654	42.6028		2	2016	60-90	N150	0	0.07	0.2598	0.2601	0	1.4791	3.1415	2.5476	0	26.0641	91.0118	72.0524	0	0.066	0.2529	0.2088
2014-07-17	0	29.3	2015-07-17	0	25.2	2016-07-22	1.7	26.2	2017-07-20		32.4			3	2016	0	8.2878	15.9246	390.11	1075.68	118.404	64.6465	1.4323	21.2448	54.5984				2	2016	60-90	N225	0	0.052	0.3202	0.3402	0	3.2169	5.2252	3.8521	0	37.4186	117.942	87.8136	0	0.1649	0.385	0.2421
2014-07-18	0	29.9	2015-07-18	0	26.2	2016-07-23		26.8	2017-07-21		33.1			1	2017	300	10.4774	18.3343	437.7	1232.46	205.308	126.147	1.58037	23.9373	61.4431	3.36077	32.0701		2	2016	60-90	N300	0	0.03	0.1301	0.08	0	1.1104	2.1811	0.8506	0	11.0842	44.1171	26.1818	0	0.011	0.187	0.0661
2014-07-19	0	30.7	2015-07-19	0	25.3	2016-07-24	44.4	28.3	2017-07-22		32.8			1	2017	225	10.8351	19.8138	438.51	1216.16	206.287	137.133	1.65624	24.709	66.4769	6.07113	43.1956		2	2017	0-30	N0	1.3611	13.9926	14.193	11.1169	11.8056	58.39	38.4507	32.5447	166.333	560.429	345.34	286.89	0.5278	1.0002	0.9642	0.5758
2014-07-20	0	29.8	2015-07-20	0	26.4	2016-07-25	1.8	26.8	2017-07-23		33.6			1	2017	150	9.90152	17.2652	426.51	1216.92	165.032	107.651	1.51258	23.2152	65.23	2.88263	37.29		2	2017	0-30	N150	2.0278	21.9859	19.4219	15.7959	21.1944	100.351	73.8541	63.5413	248.111	689.929	610.164	487.343	0.5556	1.4317	1.9245	1.5436
2014-07-21	0	32.3	2015-07-21	0	26.7	2016-07-26	5.7	24.4	2017-07-24		33			1	2017	0	9.46912	15.2774	416.92	1197.78	109.097	79.6673	1.46964	22.7121	73.0241				2	2017	0-30	N225	4.6667	22.9941	21.9024	18.8003	42.8889	112.81	103.881	94.3043	520.583	683.898	780.058	699.951	1.1111	1.7376	3.0531	2.673
2014-07-22	0	32	2015-07-22	0.1	26.9	2016-07-27		26.1	2017-07-25		32.8			2	2017	300	11.7071	20.7763	423.2	1035.35	235.054	142.967	2.10205	27.6633	60.823	11.5347	43.0986		2	2017	0-30	N300	3.0556	22.0752	19.9127	17.3363	36.7778	92.2543	85.5971	71.6764	429	624.307	726.647	611.26	1.0833	1.3728	1.7735	1.2906
2014-07-23	0	26.7	2015-07-23	2.3	26.1	2016-07-28		28.5	2017-07-26		32.7			2	2017	225	11.665	20.2818	420.4	1025.61	212.439	136.434	2.11437	27.7474	64.2227	15.1925	47.4136		2	2017	30-60	N0	0.0083	1.4906	1.3591	1.2892	0.2778	8.4974	3.7945	2.5512	0.3333	145.48	29.0104	54.9722	0.0278	0.5783	0.3272	0.2529
2014-07-24	0	26.9	2015-07-24	0	26.8	2016-07-29		29.8	2017-07-27	22.1	30.4			2	2017	150	10.7091	19.6414	412.19	1026.35	192.809	116.044	1.93972	25.9811	60.1863	16.4164	58.0336		2	2017	30-60	N150	0.0278	1.2991	1.4807	1.4212	0.3611	5.4677	4.4205	3.4258	1.9167	110.439	110.258	95.9627	0.0278	0.4436	0.5322	0.4768
2014-07-25	0	27.2	2015-07-25	0	26.4	2016-07-30	1	26.8	2017-07-28	0.1	25			2	2017	0	8.2467	15.9198	392.02	1002.15	105.758	63.5755	1.52977	21.0364	60.114				2	2017	30-60	N225	0.1944	1.6509	1.61	1.5311	1.1944	10.9808	8.3101	6.6154	14.1389	132.911	168.528	146.069	0.0556	0.5399	0.5969	0.5197
2014-07-26	0	27.9	2015-07-26	0	27.6	2016-07-31		27.2	2017-07-29	6	21.9			3	2017	300	10.8726	21.0286	398.91	1135.34	228.82	142.001	1.78028	27.2559	62.0579	6.84921	36.2994		2	2017	30-60	N300	0.0833	1.5204	1.3191	1.24	2.7222	8.2883	7.1888	3.318	11.3889	115.785	100.088	64.1031	0.0556	0.4879	0.5724	0.3277
2014-07-27	0	28.6	2015-07-27	0	29.4	2016-08-01	4.2	26.1	2017-07-30		24.9			3	2017	225	11.7826	20.0225	391.45	1122.65	219.99	141.863	1.95109	30.1	64.486	13.1768	44.4749		2	2017	60-90	N0	0	0.7199	0.21	0.1002	0	5.4462	2.9818	1.9891	0	145.119	60.1459	36.2513	0	0.4431	0.1829	0.102
2014-07-28	0	29.3	2015-07-28	0	30.6	2016-08-02		26	2017-07-31		25.7			3	2017	150	10.9333	18.5928	387.78	1123.27	191.466	123.175	1.80946	28.1947	64.3327	14.1031	47.6957		2	2017	60-90	N150	0	0.07	0.3399	0.3298	0	2.3391	3.6508	3.118	0	46.1357	100.993	87.9467	0	0.1321	0.3578	0.2781
2014-07-29	0	30.6	2015-07-29	0	30.8	2016-08-03		27.3	2017-08-01		26.7			3	2017	0	8.81787	15.6307	367.75	1101.15	119.922	65.9753	1.48866	23.9779	55.0152				2	2017	60-90	N225	0	0.052	0.3998	0.4096	0	4.8276	6.3362	4.3371	0	84.3055	145.595	126.3	0	0.2982	0.4322	0.3021
2014-07-30	0	31.1	2015-07-30	0	30.9	2016-08-04		26.8	2017-08-02		28.8																		2	2017	60-90	N300	0	0.03	0.2098	0.1899	0	1.43	3.2431	1.0505	0	29.3117	76.1364	49.037	0	0.089	0.2841	0.0991
2014-07-31	0	30.2	2015-07-31	0	31.3	2016-08-05		26.4	2017-08-03		29.3																		3	2016	0-30	N0	0.9722	16.8063	12.3878	9.7243	10.6944	62.6373	30.0315	25.2296	132.556	405.205	255.218	203.986	0.3889	0.9028	0.6215	0.4998
2014-08-01	0	29.2	2015-08-01	0	31.1	2016-08-06		26.1	2017-08-04		29.2																		3	2016	0-30	N150	1.5278	20.032	16.4416	13.559	17.2778	86.8809	60.2221	49.0566	167.528	652.487	520.318	441.55	0.5	1.2323	1.4461	1.0431
2014-08-02	0	28.8	2015-08-02	0	29.9	2016-08-07		26.3	2017-08-05		30.2																		3	2016	0-30	N225	3.0778	20.7885	19.1423	16.2772	37.6111	91.2738	84.3492	72.3393	340.111	611.926	696.809	589.805	0.9722	1.541	2.1067	1.6729
2014-08-03	0	29.5	2015-08-03	10.9	24.7	2016-08-08		26.6	2017-08-06	2.4	27.4																		3	2016	0-30	N300	3.0556	18.3282	17.614	17.5886	29.05	75.7529	75.8888	64.4893	287.028	502.608	651.955	517.828	0.7981	1.1665	0.7556	1.426
2014-08-04	0	30.3	2015-08-04	0.1	22.6	2016-08-09		26.9	2017-08-07	31.7	22																		3	2016	30-60	N0	0	1.4004	1.1413	0.9261	0.0556	6.6324	2.7444	1.8066	0.1667	105.972	13.8153	34.3161	0	0.4353	0.2049	0.1255
2014-08-05	1.4	28.6	2015-08-05	0	21.9	2016-08-10		26.8	2017-08-08	0.1	24.7																		3	2016	30-60	N150	0.025	1.2289	1.1781	1.18	0.1389	3.9435	3.1349	2.3924	0.9167	82.8982	85.1399	62.7652	0.0092	0.2878	0.3973	0.3308
2014-08-06	4.2	22.2	2015-08-06	0	25.1	2016-08-11		28.6	2017-08-09		28.6																		3	2016	30-60	N225	0.0278	1.5483	1.3669	1.3678	0.7222	8.5373	6.3371	5.1826	8.4444	110.5	130.343	90.6077	0.0453	0.3635	0.5134	0.3634
2014-08-07	14.9	18.6	2015-08-07	0	26.5	2016-08-12		30	2017-08-10		26.8																		3	2016	30-60	N300	0.0444	1.4316	1.1499	1.1549	1.8333	6.3388	5.8361	2.7642	9.8889	94.9427	69.3588	39.8389	0.0356	0.3194	0.4545	0.1708
2014-08-08	19.8	18.2	2015-08-08	0	25.5	2016-08-13		30.7	2017-08-11		27.9																		3	2016	60-90	N0	0	0.4953	0.1131	0.1123	0	4.2874	1.8946	0.9828	0	110.525	44.8844	29.5364	0	0.3323	0.1142	0.0824
2014-08-09	14.6	19.5	2015-08-09	28.9	23.8	2016-08-14		31	2017-08-12		27.9																		3	2016	60-90	N150	0	0.0655	0.2436	0.2439	0	1.3888	2.9538	2.3981	0	24.5084	85.7105	67.7859	0	0.0622	0.237	0.1956
2014-08-10	0	22	2015-08-10	0.4	24.9	2016-08-15		31	2017-08-13	9.7	24.9																		3	2016	60-90	N225	0	0.0488	0.3015	0.3194	0	3.0316	4.9183	3.632	0	35.2549	110.89	82.6527	0	0.1549	0.3622	0.2164
2014-08-11	0.2	25.2	2015-08-11	0.1	25.6	2016-08-16		30.2	2017-08-14		24.4																		3	2016	60-90	N300	0	0.0281	0.122	0.075	0	1.0442	2.0457	0.7946	0	10.3818	41.3682	23.6065	0	0.0103	0.175	0.062
2014-08-12	7.2	21	2015-08-12	48.7	24	2016-08-17		28.9	2017-08-15		26.5																		3	2017	0-30	N0	1.2778	16.904	13.289	10.4749	11.1111	65.5615	36.1146	30.7394	156.089	520.007	326.199	259.546	0.4775	0.9434	0.9053	0.5224
2014-08-13	0	23	2015-08-13	0	25	2016-08-18		29.9	2017-08-16		27.4																		3	2017	0-30	N150	1.9167	20.729	18.176	14.8092	19.9722	94.6972	69.5104	59.6565	233.194	647.736	574.576	460.261	0.5545	1.3488	1.8051	1.4484
2014-08-14	0	23.8	2015-08-14	1	23.2	2016-08-19		30.9	2017-08-17		28.3																		3	2017	0-30	N225	4.9167	21.6131	23.2051	17.5905	45.5833	106.118	112.505	88.5914	552.639	643.416	825.305	641.347	1.1944	1.6341	3.2455	2.5204
2014-08-15	0	23.8	2015-08-15	0	24.1	2016-08-20		29.8	2017-08-18		26																		3	2017	0-30	N300	3.2222	20.7788	21.0851	16.1998	38.8333	86.9084	91.4739	67.2953	453.472	585.702	768.121	568.074	1.1389	1.2957	1.8754	1.2168
2014-08-16	0	23.9	2015-08-16	0	24.9	2016-08-21		28.2	2017-08-19		25.1																		3	2017	30-60	N0	0.0056	1.3822	1.437	1.212	0.3056	8.0414	4.0088	2.3934	0.3611	136.472	30.7166	51.7536	0.0278	0.5423	0.3484	0.2377
2014-08-17	11.1	21.9	2015-08-17	0.3	22.2	2016-08-22		28.3	2017-08-20	2.1	23.3																		3	2017	30-60	N150	0.0556	1.2256	1.5868	1.3271	0.3889	5.126	4.6608	3.1283	2.0278	103.282	116.953	90.5431	0.0278	0.4185	0.5617	0.45
2014-08-18	0	23.3	2015-08-18	0.9	20.6	2016-08-23		28.7	2017-08-21	0	24.3																		3	2017	30-60	N225	0.1011	1.5422	1.5174	1.4316	1.1389	10.3266	7.9086	6.1979	13.3306	121.859	158.486	138.003	0.0581	0.489	0.5584	0.4887
2014-08-19	0	23.4	2015-08-19	0.1	22.4	2016-08-24		30.7	2017-08-22	3.5	23.1																		3	2017	30-60	N300	0.1444	1.4314	1.2356	1.1635	2.5556	7.7502	6.7789	3.1181	10.6278	108.376	94.1444	60.1865	0.0464	0.4601	0.54	0.3071
2014-08-20	0	23.7	2015-08-20	0	24.6	2016-08-25	11.4	23.4	2017-08-23		24.7																		3	2017	60-90	N0	0	0.5934	0.1982	0.1471	0	5.1099	2.7914	1.8734	0	133.968	56.6262	33.0392	0	0.4075	0.1993	0.0958
2014-08-21	0	24.3	2015-08-21	0	25.1	2016-08-26	0.1	21.4	2017-08-24		26.1																		3	2017	60-90	N150	0	0.0649	0.3208	0.3113	0	2.1892	3.4421	2.9469	0	43.203	95.1259	80.3267	0	0.1245	0.3368	0.3109
2014-08-22	0	25.1	2015-08-22	0	24.8	2016-08-27		21.8	2017-08-25	3.6	21.3																		3	2017	60-90	N225	0	0.047	0.3748	0.3872	0	4.5337	5.7855	4.0086	0	75.2584	137.357	109.047	0	0.2766	0.5087	0.2851
2014-08-23	4.2	24.7	2015-08-23	0	25.4	2016-08-28		22.1	2017-08-26	3.1	17.5																		3	2017	60-90	N300	0	0.0282	0.1971	0.1795		1.3445	3.0584	0.9884	0	24.6122	71.7039	44.2237	0	0.0839	0.2672	0.0931
2014-08-24	0	23.4	2015-08-24	0	22.1	2016-08-29		21	2017-08-27	1.9	20.3
2014-08-25	0	22.4	2015-08-25	0	22.5	2016-08-30		24.1	2017-08-28	2.8	19
2014-08-26	0	22.4	2015-08-26	0	23.8	2016-08-31		24.7	2017-08-29	15.3	16.9
2014-08-27	0	22.8	2015-08-27	0	23.7	2016-09-01		24.8	2017-08-30	3.5	16.2
2014-08-28	0	23.5	2015-08-28	0	24	2016-09-02		24.8	2017-08-31		19.8
2014-08-29	0	23.9	2015-08-29	0	23.6	2016-09-03		23.9	2017-09-01	1.7	18.7
2014-08-30	30.9	21.2	2015-08-30	0	24.9	2016-09-04		24.8	2017-09-02	1	20.3
2014-08-31	0.1	19.8	2015-08-31	0	23.8	2016-09-05		23.2	2017-09-03	1.1	19.2
2014-09-01	4.5	20.5	2015-09-01	0	23.9	2016-09-06		21.9	2017-09-04	2.6	18.3
2014-09-02	0	21	2015-09-02	0	22.8	2016-09-07		22.1	2017-09-05	8.3	18
2014-09-03	0	21.1	2015-09-03	7.6	21	2016-09-08		21.6	2017-09-06		19.9
2014-09-04	0	20.8	2015-09-04	5.8	22.1	2016-09-09	1.9	21	2017-09-07		20.7
2014-09-05	0	22.5	2015-09-05	0	23.4	2016-09-10		20.8	2017-09-08	0	21.6
2014-09-06	0	23	2015-09-06	0	24.2	2016-09-11		22.2	2017-09-09	17.4	19.3
2014-09-07	11.5	21.3	2015-09-07	0.3	21.5	2016-09-12	0.2	19.1	2017-09-10	2.5	20.9
2014-09-08	19.5	21	2015-09-08	13.6	20.4	2016-09-13		19.8	2017-09-11		19.6
2014-09-09	28.1	20.4	2015-09-09	21.8	19.4	2016-09-14	0.4	19.3	2017-09-12		20.8
2014-09-10	21.9	20.6	2015-09-10	17.5	18.7	2016-09-15	0.1	20.5	2017-09-13		21.2
2014-09-11	13.3	20	2015-09-11	4.7	21.3	2016-09-16		21.4	2017-09-14		22.6
2014-09-12	0.8	20.4	2015-09-12	0	19.1	2016-09-17		22.4	2017-09-15	0.6	21.2
2014-09-13	17	16.4	2015-09-13	0.1	17.7	2016-09-18	21.2	20.7	2017-09-16	14.5	18.6
2014-09-14	16.5	16.3	2015-09-14	0	18.1	2016-09-19	64.4	17.5	2017-09-17		20
2014-09-15	29.1	16.4	2015-09-15	0	19.1	2016-09-20	1.2	17.5	2017-09-18		22
2014-09-16	11.4	15.5	2015-09-16	3.4	18	2016-09-21		18.3	2017-09-19	0	22.4
2014-09-17	4.9	16.8	2015-09-17	0.7	19	2016-09-22		19.7	2017-09-20		21.9
2014-09-18	0	18.1	2015-09-18	0.1	20	2016-09-23		22.4	2017-09-21		21.8
2014-09-19	0	18.8	2015-09-19	0	19.6	2016-09-24	0.7	20.5	2017-09-22		19.6
2014-09-20	0	19.4	2015-09-20	0	19.9	2016-09-25		20	2017-09-23		20.6
2014-09-21	0	20	2015-09-21	0	20	2016-09-26	4.1	18.4	2017-09-24		20.7
2014-09-22	1.9	19.7	2015-09-22	3.9	19.6	2016-09-27	0.5	18.4	2017-09-25	4.9	19.5
2014-09-23	0.5	16.6	2015-09-23	0	18.1	2016-09-28		18.5	2017-09-26	15.4	17.9
2014-09-24	0	18	2015-09-24	6.2	17.5	2016-09-29		16.5	2017-09-27	34.3	16.1
2014-09-25	0	16.4	2015-09-25	0	18.9	2016-09-30		18.9	2017-09-28		17
2014-09-26	0	18.6	2015-09-26	0.1	20.7	2016-10-01		20.3	2017-09-29		19.4
2014-09-27	4.4	19	2015-09-27	0.1	21	2016-10-02		20.1	2017-09-30	1	17.5
2014-09-28	25.3	17	2015-09-28	0.2	18.2	2016-10-03		20.5	2017-10-01	0.8	18
2014-09-29	0	18.7	2015-09-29	0	17.6	2016-10-04		18.9	2017-10-02		18
2014-09-30	0	20.4	2015-09-30	8.8	16	2016-10-05	10.8	13.3	2017-10-03	37.9	12.4
2014-10-01	13.9	18.5	2015-10-01	0	13.3	2016-10-06	6.1	12.8	2017-10-04	19.8	11.3
2014-10-02	0	18.1	2015-10-02	0	10.3	2016-10-07	7.3	15.8	2017-10-05		12.1
2014-10-03	0	18	2015-10-03	0	11.7	2016-10-08		15.6	2017-10-06		14.4
2014-10-04	0	19.6	2015-10-04	0	14.2	2016-10-09	10.8	12.9	2017-10-07		16
2014-10-05	0	16.6	2015-10-05	0	14.5	2016-10-10	0.3	12.5	2017-10-08	1.5	15.7
2014-10-06	0	16.3	2015-10-06	0	14.9	2016-10-11		13.6	2017-10-09	10.1	12.2
2014-10-07	0	16.4	2015-10-07	3.3	17.5	2016-10-12	3.1	13.2	2017-10-10	41	8
2014-10-08	0	16.6	2015-10-08	0.7	14.2	2016-10-13		14.7	2017-10-11	24.8	6.2
2014-10-09	0	18.3	2015-10-09	0	11.9	2016-10-14	1.4	13.9	2017-10-12	0.1	10.9
2014-10-10	0	17.1	2015-10-10	0	14.5				2017-10-13	0.2	11.6
2014-10-11	0	14.3	2015-10-11	0	12.6				2017-10-14	0.4	12.2
2014-10-12	0.1	9.5	2015-10-12	0	12
2014-10-13	0	10.7	2015-10-13	0	12.7
2014-10-14	0	10.7	2015-10-14	0	15.4
			2015-10-15	0	15.3
[truncated: 23 more columns]
